# Supplementary material
Source: PubMed Central journal article supplement (PMC3233222)

**A**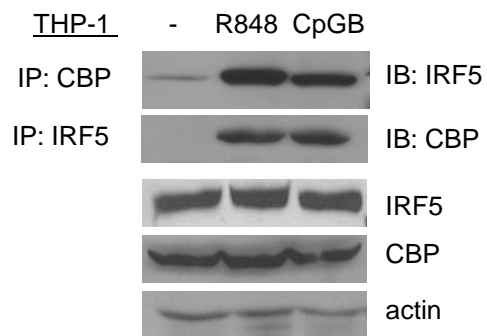**B**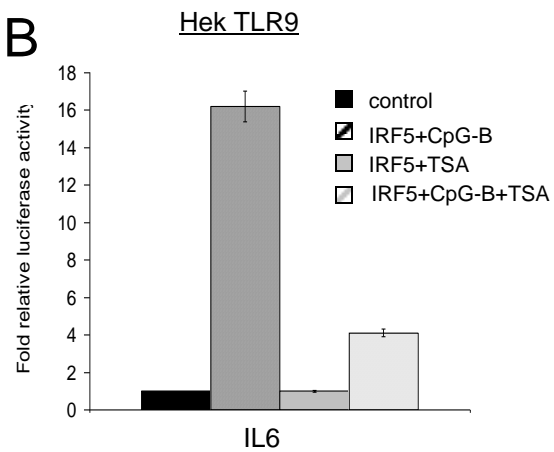**C**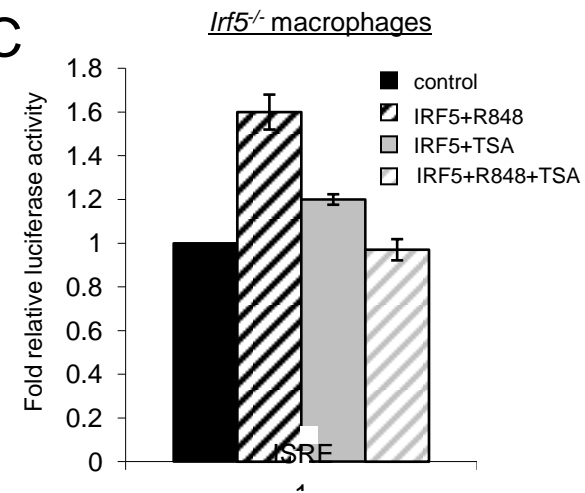**D**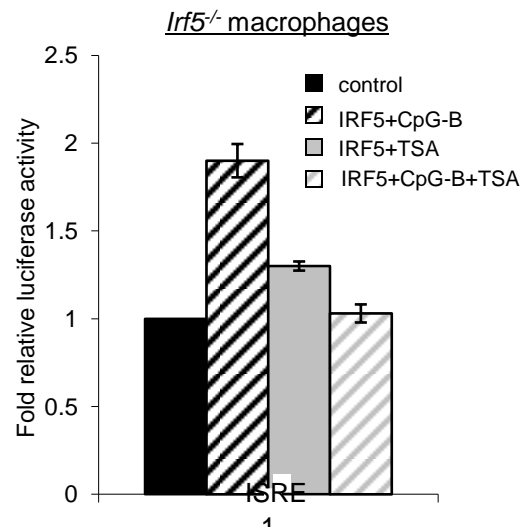

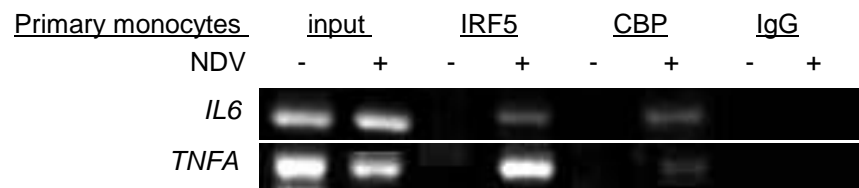

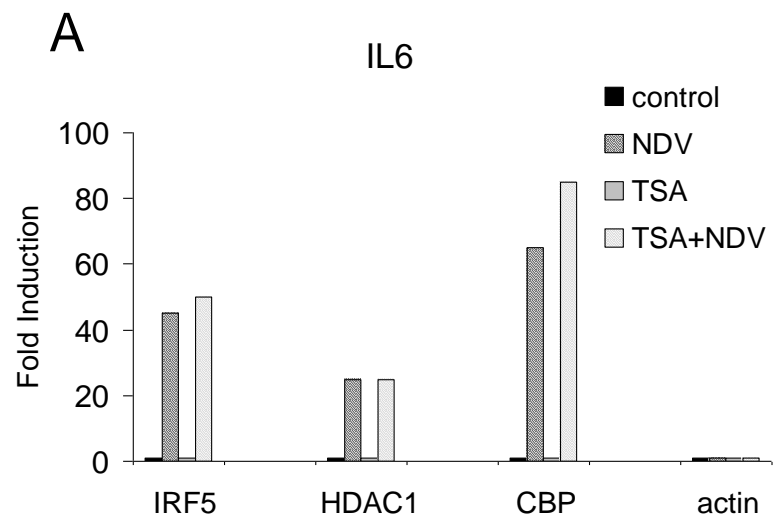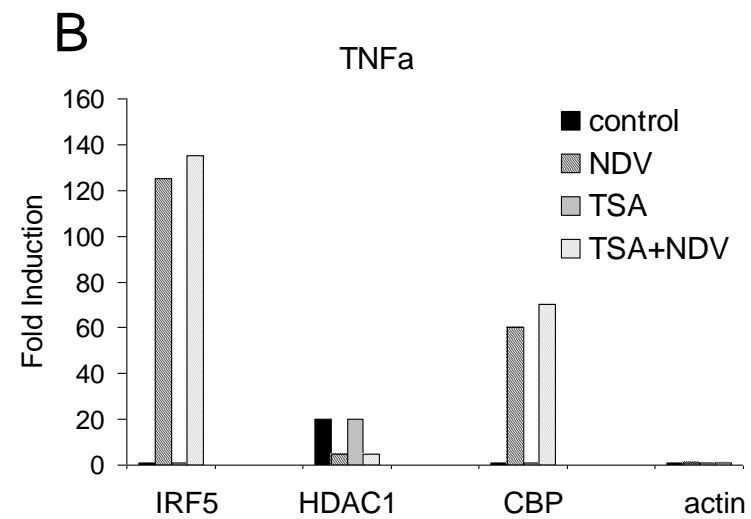

Supplement: NIHMS338029-supplement-Suppl_figures.pdf [file NIHMS338029-supplement-Suppl_figures.pdf]
